# Supplementary material
Source: Springer Nature journal article supplement (https://www.springermedizin.de/resource/supplementary/12885_2010_2260_MOESM2_ESM.pdf/9460878)

**A**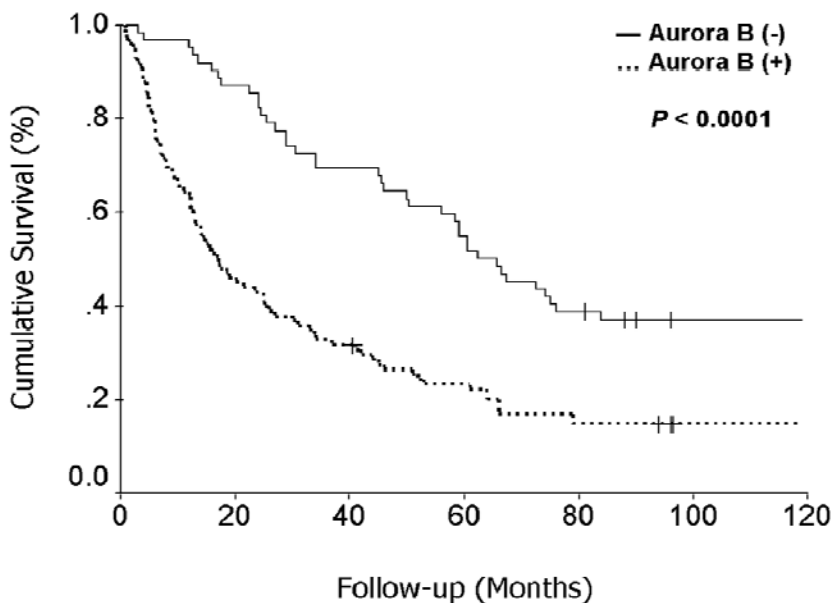**B**

Conditional Effect Plot of Age and Aurora B on the Probability of ETR  
Based on Fitted Multiple Logistic Regression Model

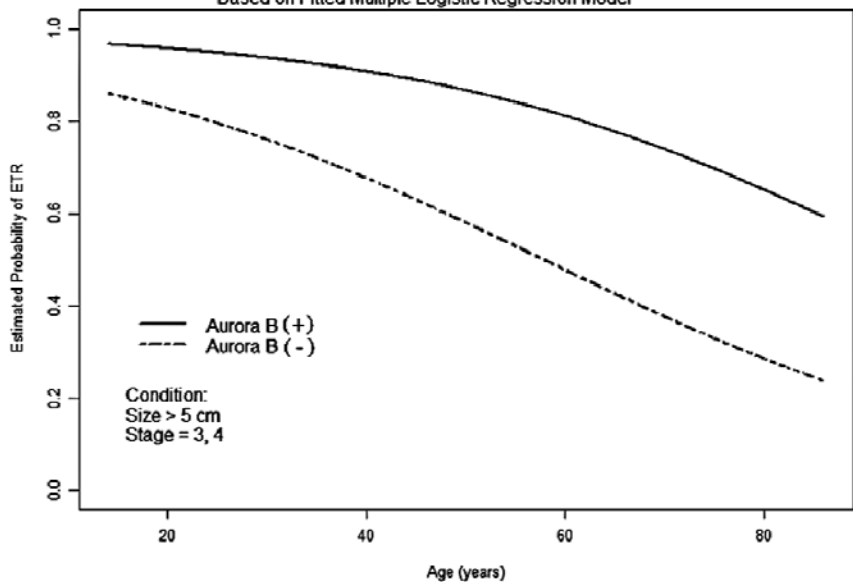

Supplement: MOESM2 [file 9460878]
